# Supplementary material for: Hypoxia shapes the immune landscape in lung injury promoting inflammation persistence
Source: bioRxiv or medRxiv preprint supplement (doi:10.1101/2022.03.11.483935), 2022-03-11
Supplement: Supplementary file [file media-1.pdf]

## Supplementary data

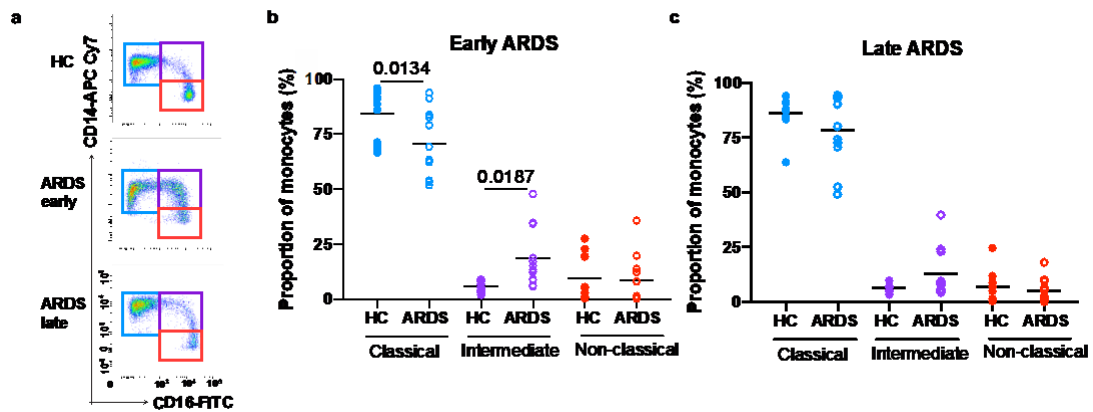

**Figure S1. Monocyte sub-populations are altered early in ARDS**

(a) Representative plots and proportions of monocyte sub-populations based on CD14 and CD16 expression early and (b) late (c). **b, c** one-way ANOVA with Holm-Sidak post-test.

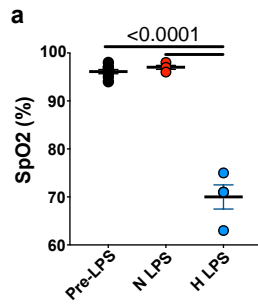

**Figure S2. Oxygen saturations in mice post LPS injury (a)** Oxygen saturations in mice were measured in mice at baseline pre-LPS nebulisation (pre-LPS) and 6 hours post-LPS (N LPS- mice housed in normoxia post-LPS, H LPS- mice housed in hypoxia post-LPS). (Pre-LPS n=6, N LPS n=3, H LPS n=3). Statistical testing performed using one-way ANOVA with Tukey's multiple comparisons test.

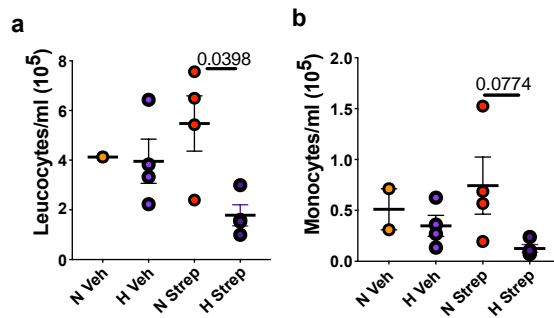

**Figure S3. *Streptococcus pneumoniae* infection in hypoxia leads to leukopenia and monocytopenia.** Mice were inoculated with *Streptococcus pneumoniae* (Strep) or vehicle (Veh) intratracheally (i.t.) and housed in normoxia (N) or hypoxia (H) until 24 hours post-i.t. **(a)** Blood cell counts and **(b)** monocyte counts mice housed in normoxia (N) or hypoxia (H) for 24 hours (Veh N and H n=4, Strep N and H n=6). Statistical testing performed using one-way ANOVA with Tukey's multiple comparisons test.

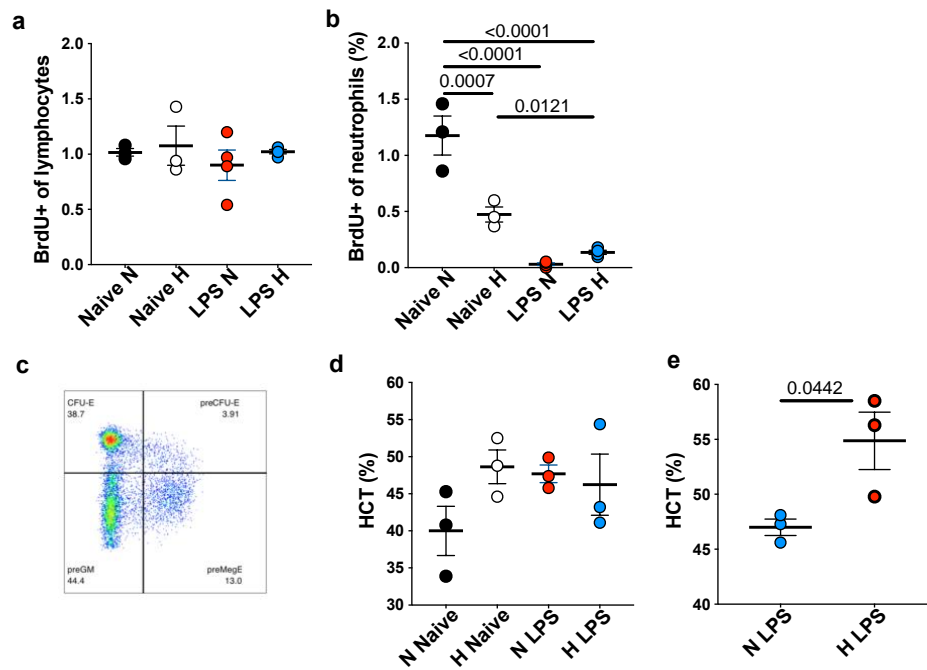

**Figure S4. Impact of hypoxia on bone marrow cell egress and composition (a)** BrdU+ blood lymphocytes (CD3 and CD19<sup>+</sup>) and **(b)** BrdU+ blood neutrophil proportion in mice treated with LPS and housed in normoxia (N) and hypoxia (H) for 24 hours (Naïve N and H n=3, LPS N and H n=4). Data representative of 2 experiments **(c)** gating strategy for bone marrow common myeloid progenitor progeny on CD41<sup>-</sup> CD16/32<sup>-</sup> cells. **(d)** blood hematocrit at 24 hours (n=3/ group) data representative of 3 experiments or **(e)** 5 days in mice treated with LPS and housed in normoxia (N) and hypoxia (H) (n=3/group). Data representative of 2 experiments **(a, b)** Statistical testing performed using one-way ANOVA with Tukey's multiple comparisons test, **(e)** statistical testing performed using two-tailed unpaired t-test.

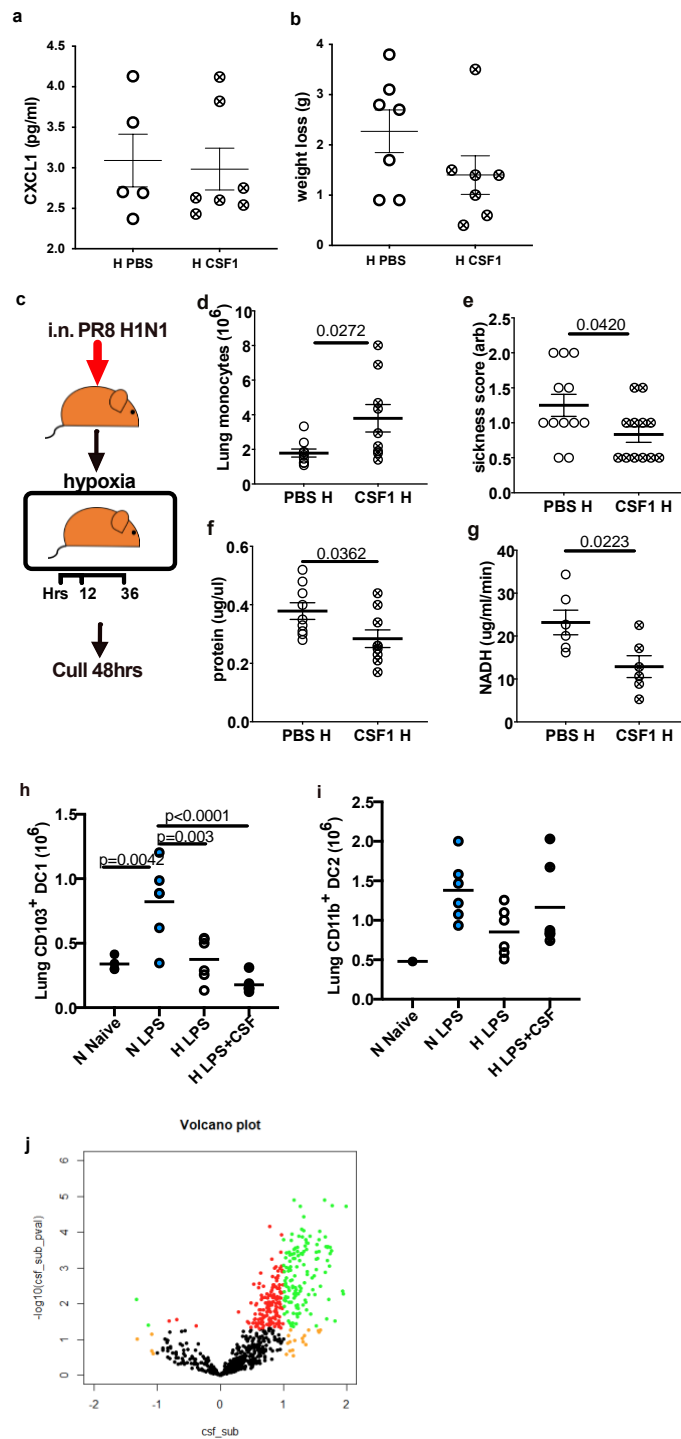

**Figure S5. CSF1-Fc alters monocyte phenotype and improves injury outcomes**

(a) BAL CXCL1 (b) weight loss in hypoxic LPS-induced ALI treated with PBS (H PBS) or CSF1 (H CSF1)(c) Schematic of virally-induced ALI plaque-forming units (p.f.u.).

(d) Lung monocyte numbers, (e) arbitrary sickness scores, (f) BAL protein and (g) LDH activity (as measured by NADH) were measured at 48 hours in mice with virally-induced ALI housed in hypoxia and receiving either PBS or CSF1. (h) Lung cDC1 (gated on Alive CD45<sup>+</sup>Lin<sup>-</sup>CD64<sup>-</sup>CD11c<sup>+</sup>Cd103<sup>+</sup>) and (i) cDC2 (gated on Alive CD45<sup>+</sup>Lin<sup>-</sup>CD64<sup>-</sup>CD11c<sup>+</sup>Cd103<sup>-</sup> CD11b<sup>+</sup>) chimerism relative to blood monocyte chimerism in non-LPS-treated (naïve) or LPS-treated mice housed in normoxia (N) or hypoxia (H) and receiving PBS or CSF1. (j) Volcano plot of measured genes in classical monocytes from mice treated with LPS and housed in hypoxia for 5 days and treated with PBS or CSF1-Fc for 4 days. Green dots correspond to genes with log<sub>2</sub> change > 1 or < -1 and with p values <0.05. Orange dots denote genes changing > 1 or < -1 with p values >0.05. Red dots denote genes with log<sub>2</sub> changes out-with the differential expression range but with p values <0.05. Data shown as mean ±SEM with each data point representing an individual mouse. Statistics **d** two-tailed Mann-Whitney following D'Agostino & Pearson normality test, **f, g** One way ANOVA with Tukeys' multiple comparisons test, **h, i** One way ANOVA with Kruskal-Wallis multiple comparisons test.

**Table S1. Patient demographics, clinical severity and oxygenation**

| Group | Gender | Age | APACHE II score | Lowest recorded PaO <sub>2</sub> prior to sampling | FiO <sub>2</sub> (%) at time of pre-sample oxygenation recording | Cause of ARDS: Pulmonary or Extrapulmonary |
|-------|--------|-----|-----------------|----------------------------------------------------|------------------------------------------------------------------|--------------------------------------------|
| Early | F      | 58  | 19              | 9.8                                                | 70                                                               | Extrapulmonary                             |
| Early | M      | 78  | 31              | 8.1                                                | 100                                                              | Extrapulmonary                             |
| Early | M      | 73  | 19              | 9.1                                                | 21                                                               | Pulmonary                                  |
| Early | F      | 46  | 15              | 10                                                 | 100                                                              | Pulmonary                                  |
| Late  | M      | 72  | 21              | 7.9                                                | 40                                                               | Extrapulmonary                             |
| Late  | F      | 72  | 17              | 9.1                                                | 35                                                               | Extrapulmonary                             |
| Late  | M      | 74  | 9               | 8.9                                                | 40                                                               | Extrapulmonary                             |
| Late  | F      | 53  | 30              | 6.9                                                | 45                                                               | Extrapulmonary                             |
| Early | M      | 63  | 19              | 9                                                  | 25                                                               | Pulmonary                                  |
| Late  | M      | 49  | 16              | 7                                                  | 45                                                               | Pulmonary                                  |
| Early | F      | 72  | 29              | 7.3                                                | 80                                                               | Pulmonary                                  |
| Late  | M      | 57  | 38              | 8.4                                                | 60                                                               | Pulmonary                                  |
| Early | F      | 51  | 24              | 7.8                                                | 30                                                               | Pulmonary                                  |
| Early | M      | 67  | 21              | 9.2                                                | 50                                                               | Pulmonary                                  |
| Early | F      | 42  | 21              | 12                                                 | 70                                                               | Extrapulmonary                             |
| Early | M      | 54  | 7               | 6.1                                                | 70                                                               | COVID+ ARDS                                |
| Late  | F      | 41  | 13              | 9.7                                                | 60                                                               | COVID+ ARDS                                |
| Late  | M      | 32  | 21              | 14.1                                               | 55                                                               | Extrapulmonary                             |
| Early | M      | 54  | 27              | 8.4                                                | 30                                                               | Pulmonary                                  |
| Early | F      | 56  | 13              | 9.5                                                | 45                                                               | COVID+ ARDS                                |
| Late  | F      | 60  | 13              | 7.7                                                | 35                                                               | Extrapulmonary                             |
| Late  | M      | 53  | 18              | 15                                                 | 75                                                               | Pulmonary                                  |
| Late  | M      | 53  | 11              | 8.2                                                | 60                                                               | Pulmonary                                  |
